# Supplementary material for: A genetic investigation in five Chinese families with keratoconus
Source: PeerJ journal article supplement (doi:10.7717/peerj.18037), 2024-09-02

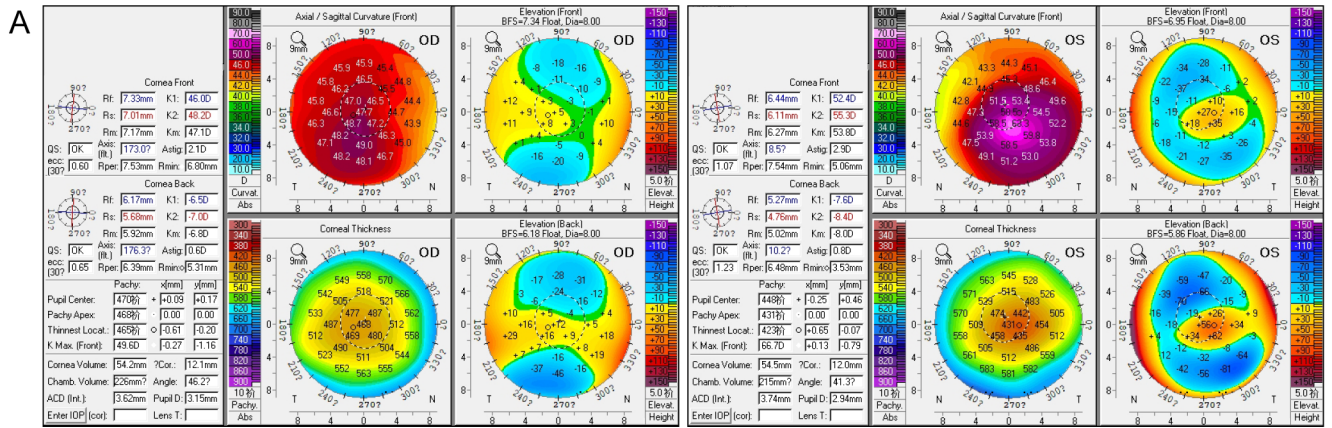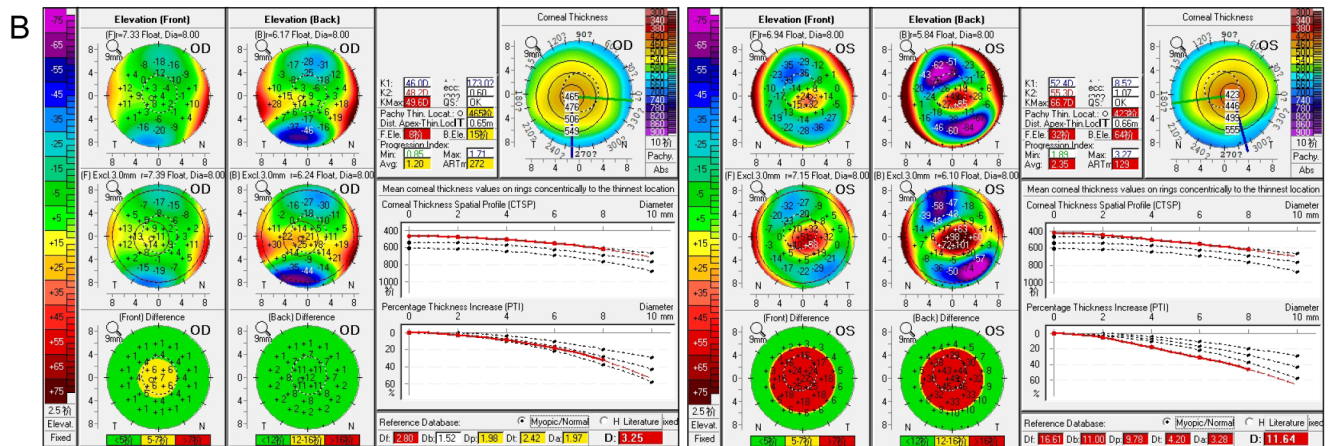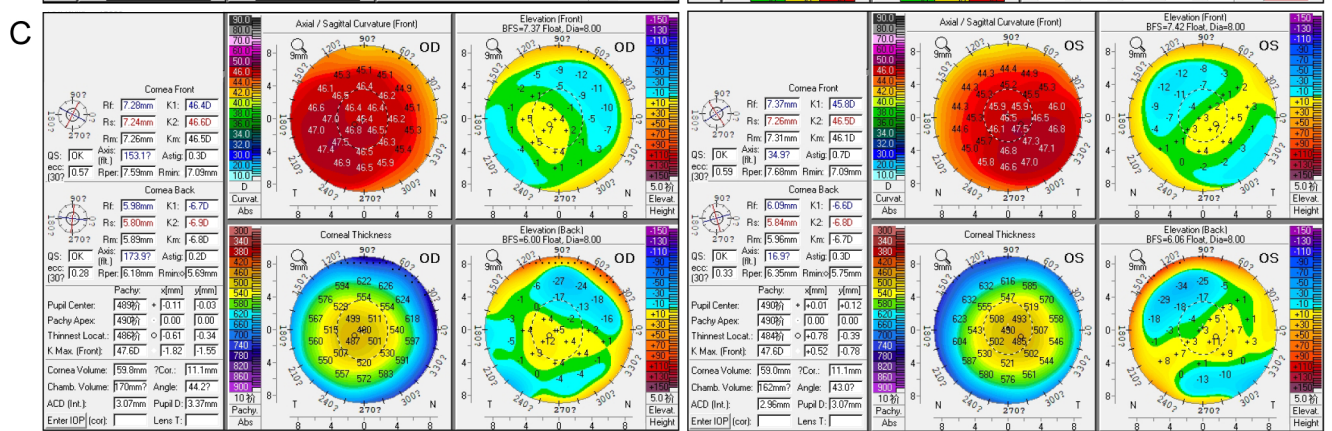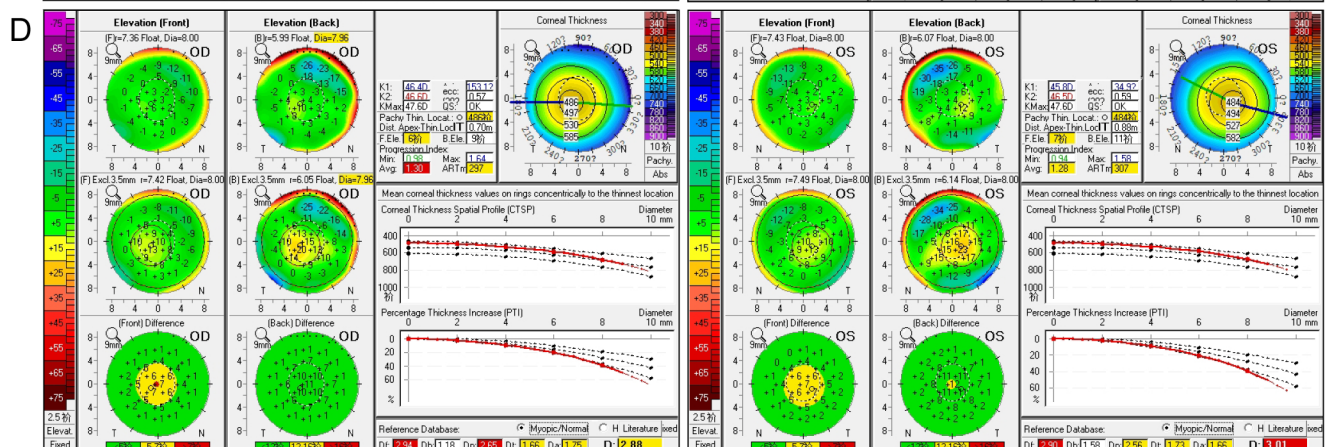

Supplement: Fig._S1.pdf [file Fig._S1.pdf]
