# Supplementary material for: A genetic investigation in five Chinese families with keratoconus
Source: PeerJ journal article supplement (doi:10.7717/peerj.18037), 2024-09-02
Supplement: Fig._S6.pdf [file Fig._S6.pdf]

**a**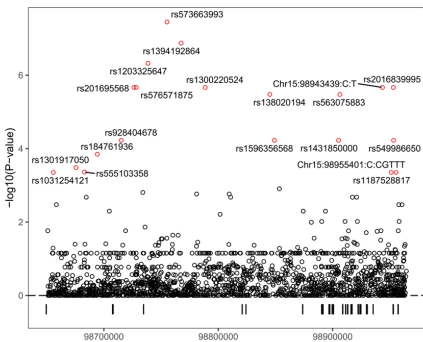**IGF1R**

Physical Length:299.6kb

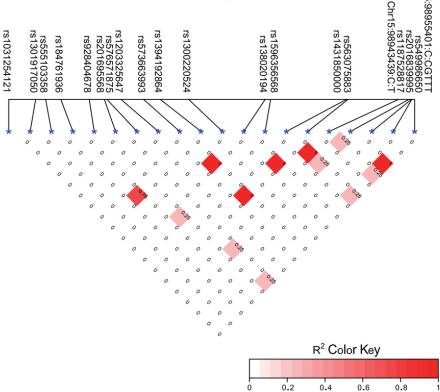**R<sup>2</sup> Color Key****b**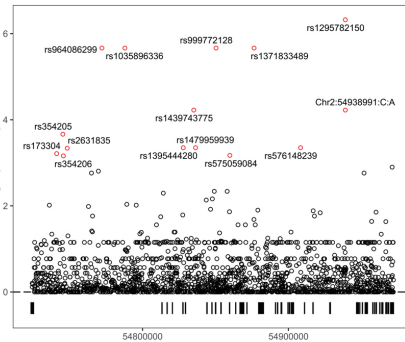**EML6**

Physical Length:197.9kb

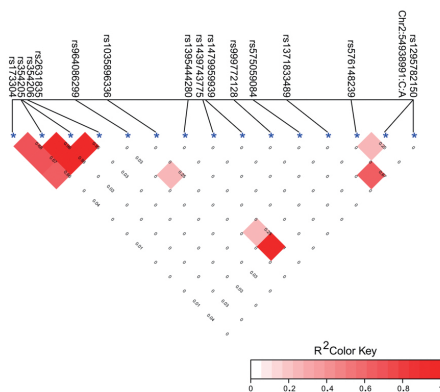**R<sup>2</sup> Color Key****c**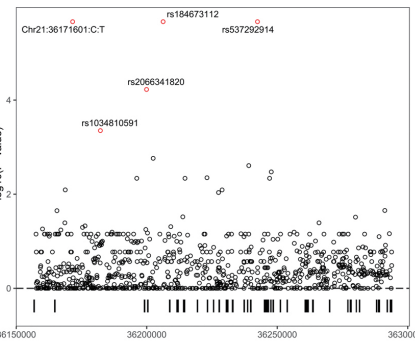**DOP1B**

Physical Length:70.8kb

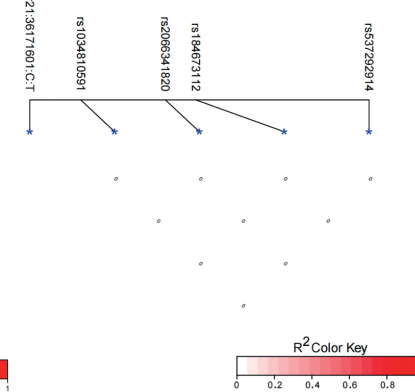**R<sup>2</sup> Color Key****d**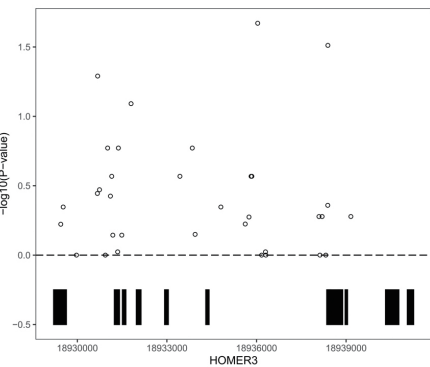**HOMER3****e**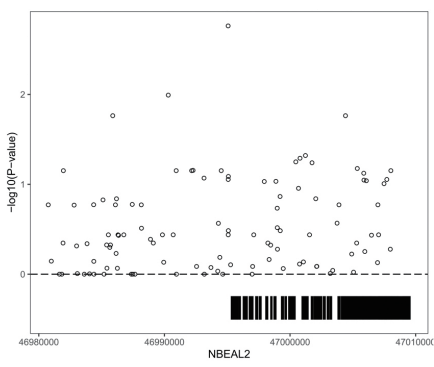**NBEAL2**
